# Supplementary material for: Applying Gel-Supported Liquid Extraction to Tutankhamun’s Textiles for the Identification of Ancient Colorants: A Case Study
Source: MDPI journal article supplement (doi:10.3390/gels9070514), 2023-06-25
Supplement: s1 [file s1]

# Applying Gel-Supported Liquid Extraction to Tutankhamun's Textiles for the Identification of Ancient Colorants: A Case Study

**Greta Peruzzi** <sup>1,2,\*</sup>, **Alessandro Ciccola** <sup>3,\*</sup>, **Adele Bosi** <sup>3,4</sup>, **Ilaria Serafini** <sup>3</sup>, **Martina Negozio** <sup>5</sup>, **Nagmeldeen Morshed Hamza** <sup>4,5,6</sup>, **Claudia Moricca** <sup>5</sup>, **Laura Sadori** <sup>5</sup>, **Gabriele Favero** <sup>5</sup>, **Valentina Nigro** <sup>7</sup>, **Paolo Postorino** <sup>2</sup> and **Roberta Curini** <sup>3</sup>

<sup>1</sup> Institute for Complex System, National Research Council, Sapienza University, Piazzale Aldo Moro 5, 00185 Rome, Italy

<sup>2</sup> Department of Physics, Sapienza University of Rome, Piazzale Aldo Moro 5, 00185 Rome, Italy; paolo.postorino@roma1.infn.it

<sup>3</sup> Department of Chemistry, Sapienza University of Rome, Piazzale Aldo Moro 5, 00185 Rome, Italy; adele.bosi@uniroma1.it (A.B.); ilaria.serafini@uniroma1.it (I.S.); roberta.curini@uniroma1.it (R.C.)

<sup>4</sup> Department of Earth Sciences, Sapienza University of Rome, Piazzale Aldo Moro 5, 00185 Rome, Italy; nagmeldeenmorshed.hamza@uniroma1.it

<sup>5</sup> Department of Environmental Biology, Sapienza University of Rome, Piazzale Aldo Moro 5, 00185 Rome, Italy; negozi.1920109@studenti.uniroma1.it (M.N.); claudia.moricca@uniroma1.it (C.M.); laura.sadori@uniroma1.it (L.S.); gabriele.favero@uniroma1.it (G.F.)

<sup>6</sup> Grand Egyptian Museum, Conservation Center, Al Remaya Square, Giza 3513204, Egypt

<sup>7</sup> ENEA C.R. Frascati, Fusion and Technologies for Nuclear Safety and Security Department, Via E. Fermi 45, 00044 Frascati, Italy; valentina.nigro@enea.it

\* Correspondence: gretaperuzzi@icloud.com (G.P.); alessandro.ciccola@uniroma1.it (A.C.)

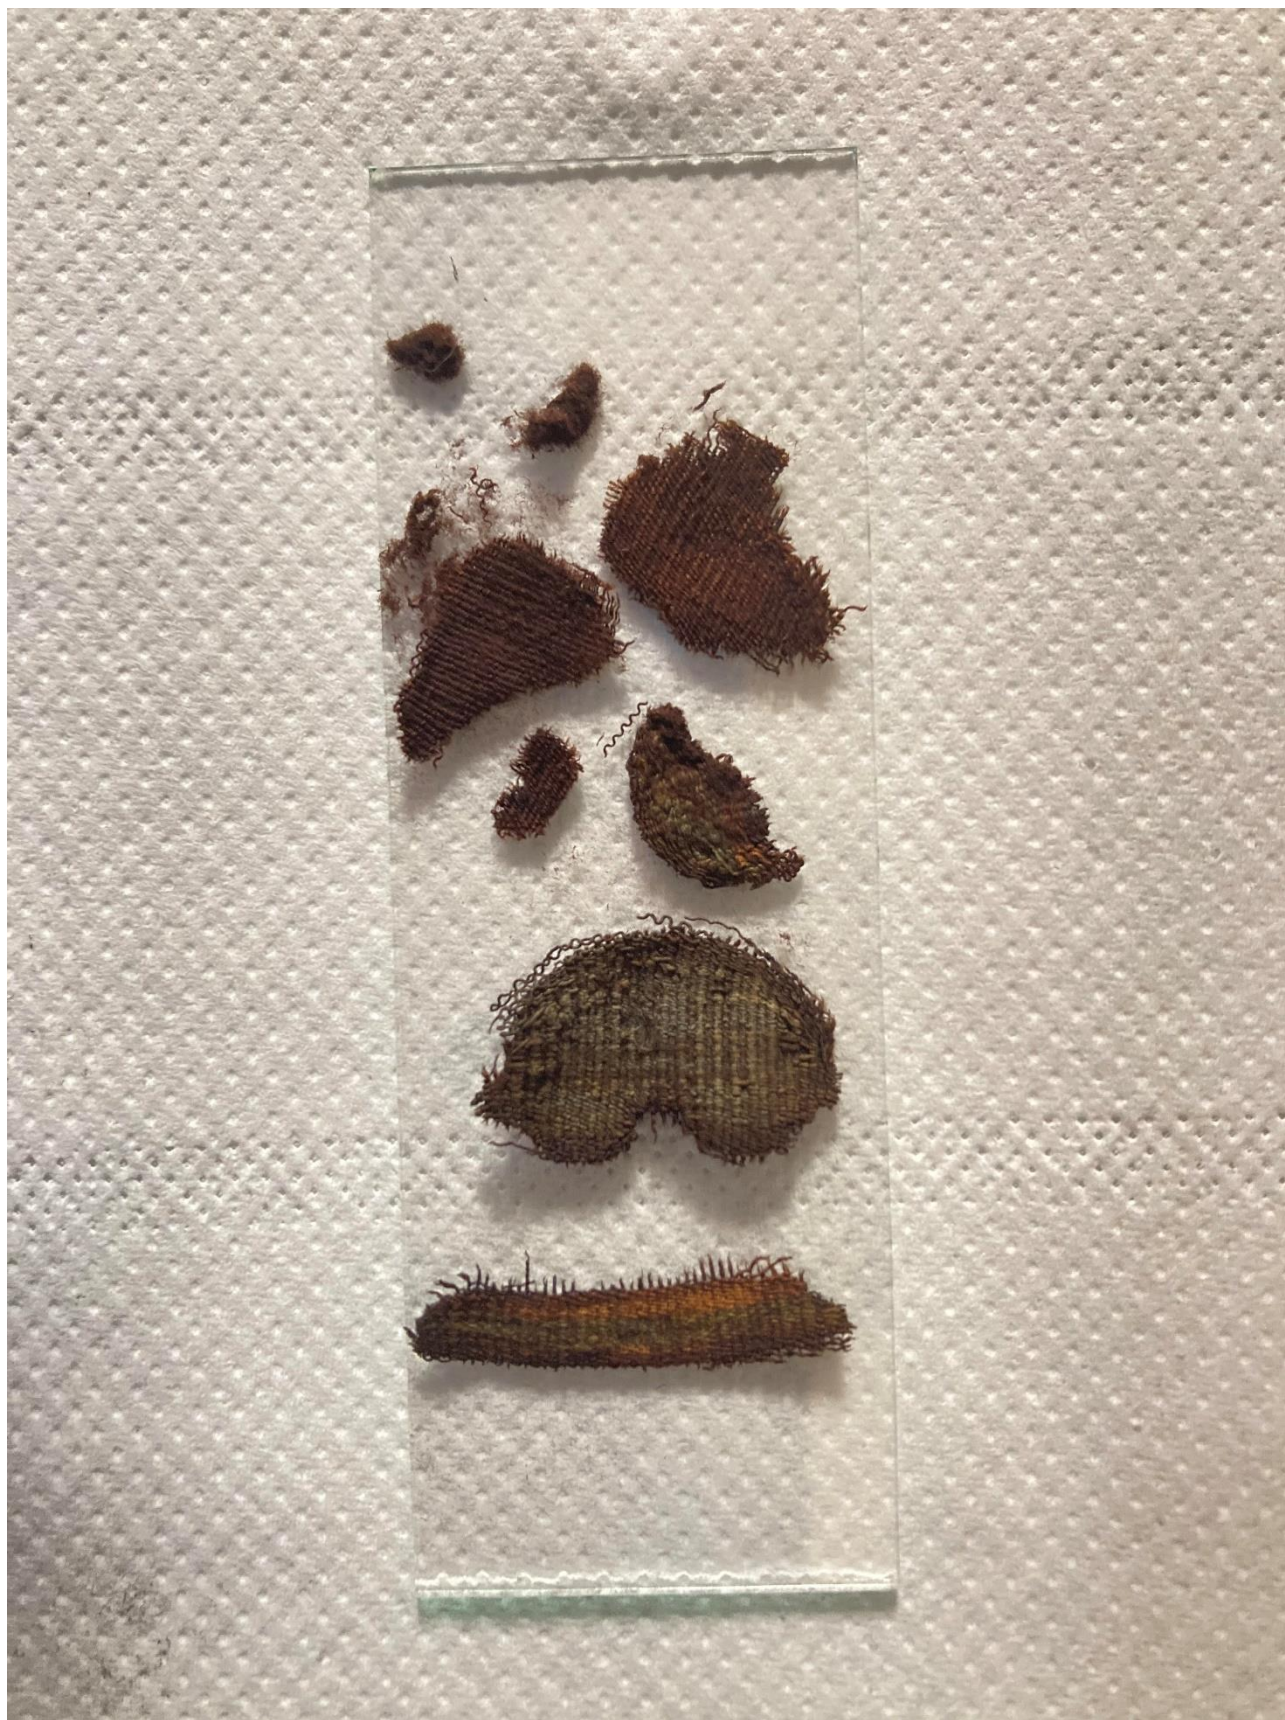

Figure S1: the historical samples from Tutankhamun's tomb analysed in the paper, constituted by archaeological textile fragments.



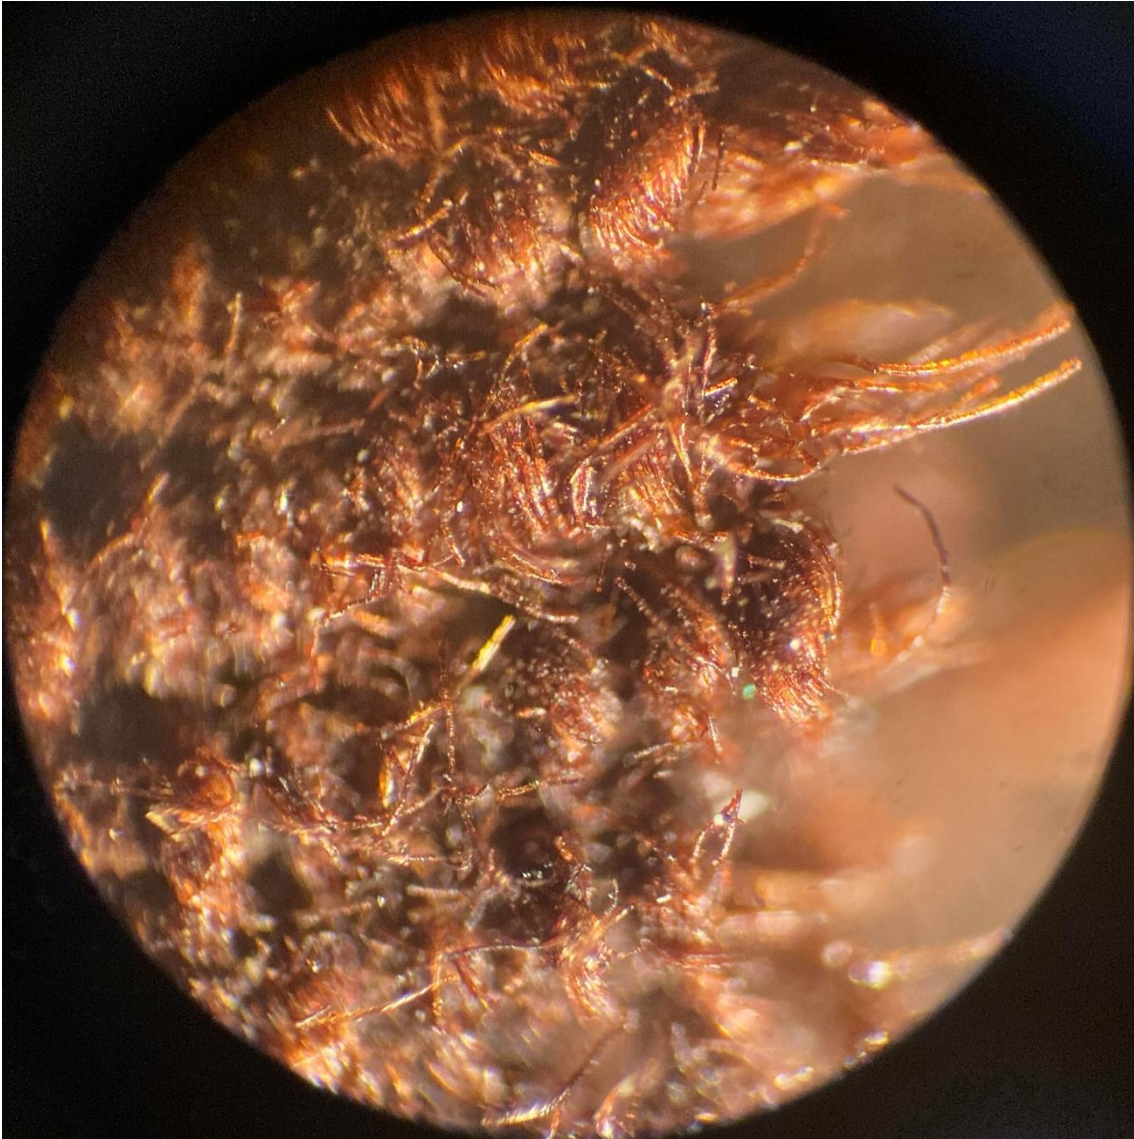

Figure S2: a 10x magnification image of a red area on the analysed textile fragment.

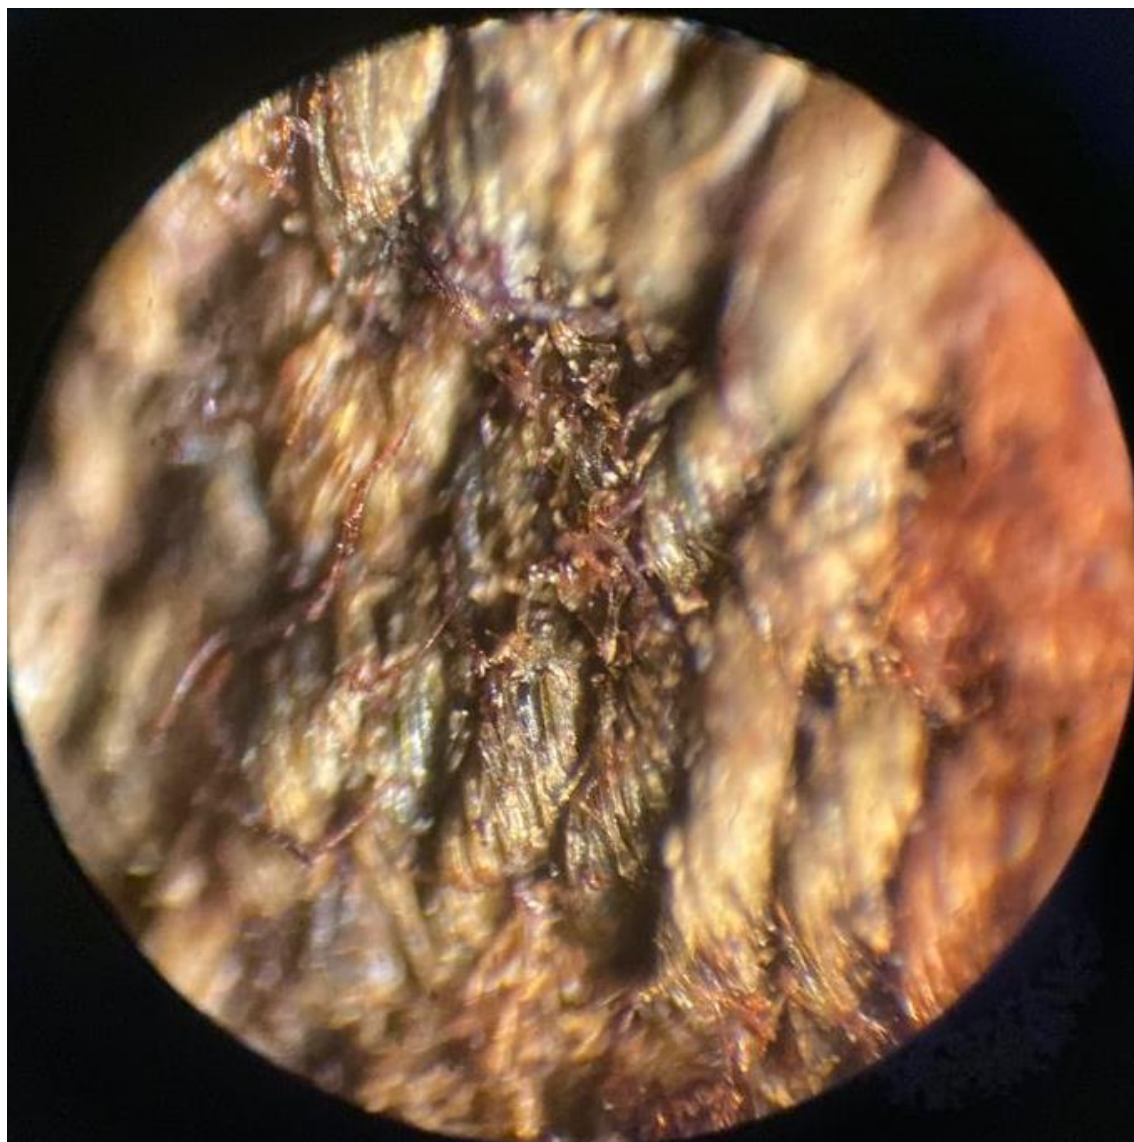

Figure S3: a 10x magnification image of a bluish area on the analysed textile fragment.
